# Supplementary material
Source: PubMed Central journal article supplement (PMC8176442)
Supplement: NIHMS1705708-supplement-Supplement.pdf [file NIHMS1705708-supplement-Supplement.pdf]

## Supporting Information for A Toolkit for Bioimaging Using Near-Infrared AgInS<sub>2</sub>/ZnS Quantum Dots

Armen Shamirian,<sup>a</sup> Oliver Appelbe,<sup>b</sup> Qingbei Zhang,<sup>b</sup> Balaji Ganesh,<sup>c</sup> Stephen J. Kron,<sup>b</sup> and  
Preston T. Snee<sup>a\*</sup>

*a. Department of Chemistry, University of Illinois at Chicago, 845 West Taylor Street, Chicago, Illinois 60607. b. Department of Molecular Genetics and Cell Biology, The University of Chicago, Chicago, Illinois 60637. c. Research Resources Center, University of Illinois at Chicago, 835 S. Wolcott Ave, Chicago, Illinois 60612*

| <i>Index</i>                                                                                                                                                 | <i>Page</i> |
|--------------------------------------------------------------------------------------------------------------------------------------------------------------|-------------|
| Figure S1. XPS survey spectrum of core AgInS <sub>2</sub> and core/shell AgInS <sub>2</sub> /ZnS QDs.                                                        | S2          |
| Figure S2. Optical band gap of the QDs from extrapolating the linear portion of Tauc plots.                                                                  | S2          |
| Figure S3. Quantum yield data on core AgInS <sub>2</sub> and AgInS <sub>2</sub> /ZnS core/shell QDs .                                                        | S3          |
| Figure S4. Photostability of core AgInS <sub>2</sub> QDs .                                                                                                   | S4          |
| Table S1. DLS data on water-soluble AgInS <sub>2</sub> /ZnS QDs.                                                                                             | S4          |
| Figure S5. Gel electrophoresis on water soluble polyacrylic acid coated AgInS <sub>2</sub> /ZnS quantum dots and PEGylated QDs.                              | S5          |
| Figure S6. Absorption of water-soluble QDs before and after incubation in bovine serum.                                                                      | S5          |
| Figure S7. Absorption spectra of dye functionalized AgInS <sub>2</sub> /ZnS QDs before and after dialysis.                                                   | S6          |
| Figure S8. Emission and photoluminescence excitation spectra of emissive ratiometric AgInS <sub>2</sub> /ZnS dots and QD-fluorescein dye coupled pH sensors. | S6          |
| Figure S9. Flow cytometry data of cell toxicity of water-soluble AgInS <sub>2</sub> /ZnS dots.                                                               | S7          |

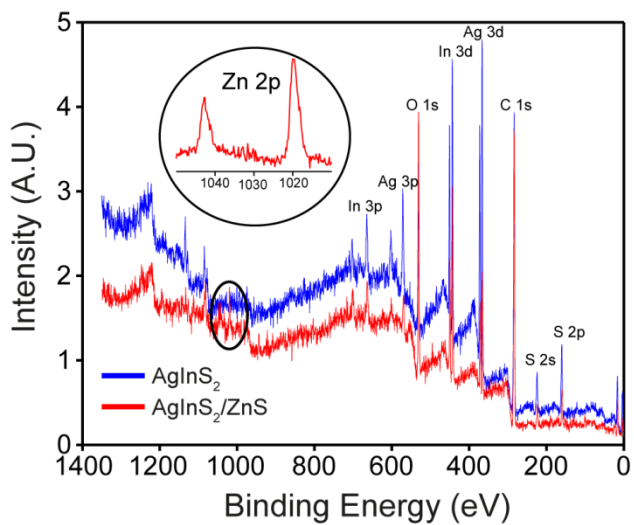

**Fig. S1.** XPS survey spectrum of core  $\text{AgInS}_2$  and core/shell  $\text{AgInS}_2/\text{ZnS}$  QDs.

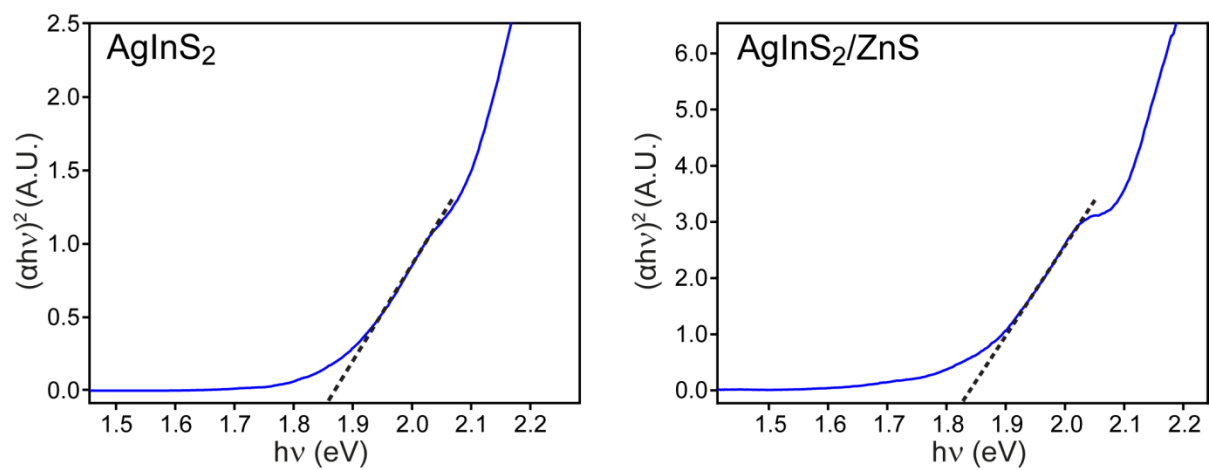

**Fig. S2.** Optical bandgaps of core  $\text{AgInS}_2$  (left) and core/shell  $\text{AgInS}_2/\text{ZnS}$  (right) QDs from extrapolating the linear portion of Tauc plots.

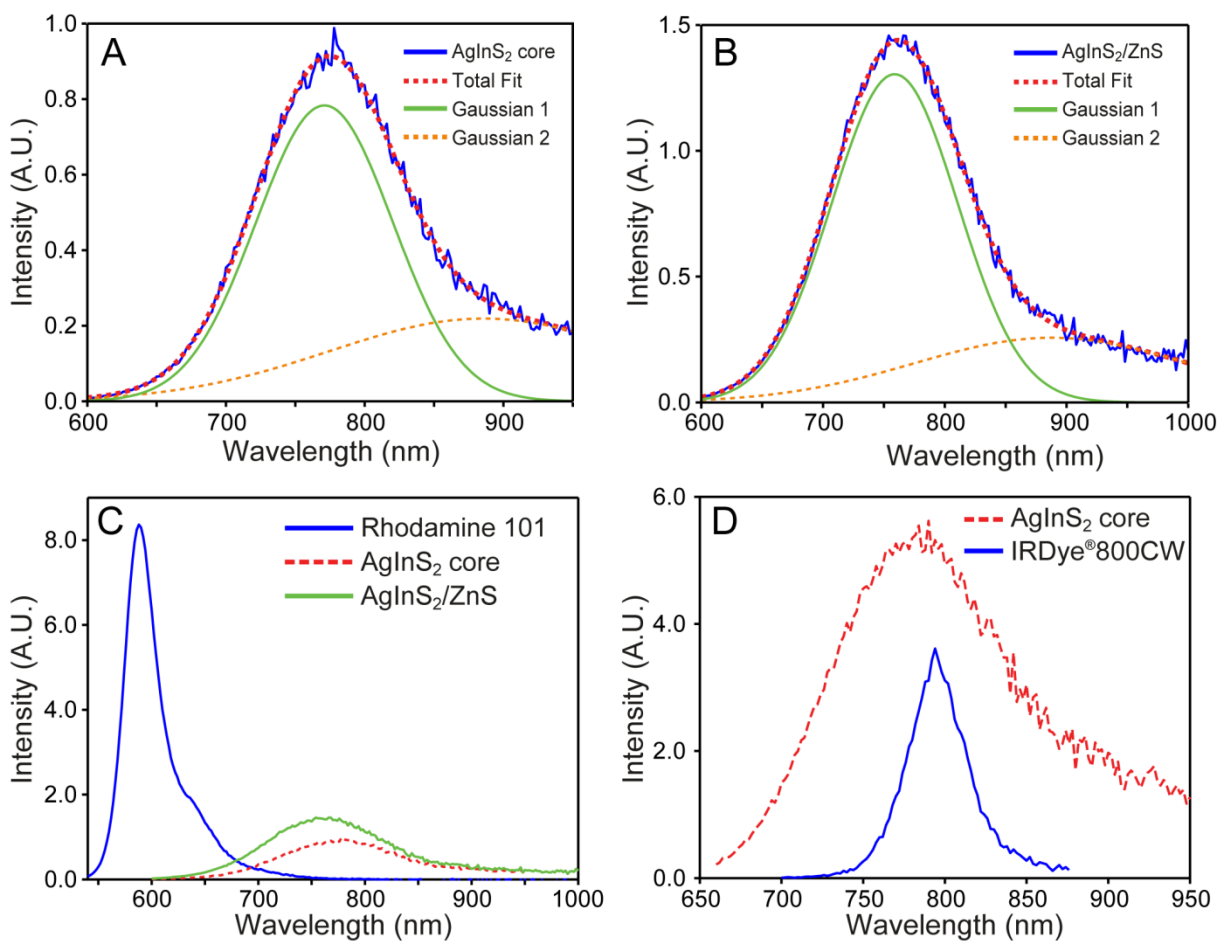

**Fig. S3.** a, b) Quantum yield measurements were calculated by Gaussian decomposition of the spectrum. The red tail of the emission was excluded when calculating the quantum yields. c) An example of the emission spectra of samples and Rhodamine 101 dye standard used to determine the quantum yields. d) An example of the emission spectra of AgInS<sub>2</sub> and IRDye<sup>®</sup> 800CW dye used to determine the quantum yield. This dye is not a good standard for AgInS<sub>2</sub>/ZnS samples.

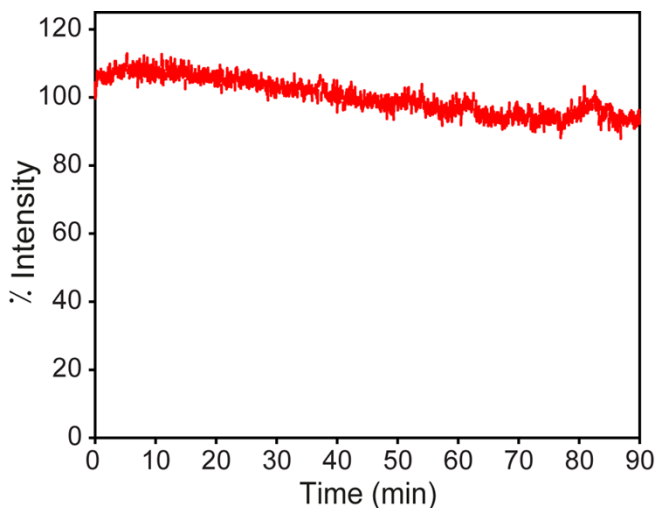

**Fig. S4.** Photostability of AgInS<sub>2</sub> quantum dots as measured by the emission intensity at 750 nm over the course of 1.5 hours of continuous illumination. Data on core/shell AgInS<sub>2</sub>/ZnS dots are essentially identical.

| Sample          | Radius (nm) | %Pd  | MW-R (kDa) | % Intensity | % Mass |
|-----------------|-------------|------|------------|-------------|--------|
| Silane: Peak 1  | 14.595      | 11.8 | 1783       | 3.4         | 48.0   |
| Silane: Peak 2  | 82.535      | 8.8  | 102739     | 96.6        | 52.0   |
| Polymer: Peak 1 | 6.142       | 7.2  | 235        | 8.6         | 97.1   |
| Polymer: Peak 2 | 59.825      | 11.9 | 48387      | 91.4        | 2.9    |

**Table S1.** Hydrodynamic radius (Radius, nm), polydispersity (%Pd), apparent molecular weight (MW R kDa), scattering intensity (%Intensity), and mass weight (% Mass) of water-soluble AgInS<sub>2</sub>/ZnS as a function of preparation method. Both samples showed ~10 nm sized materials and larger aggregates likely from side products or dust that was present as the samples were not filtered prior to measurement.

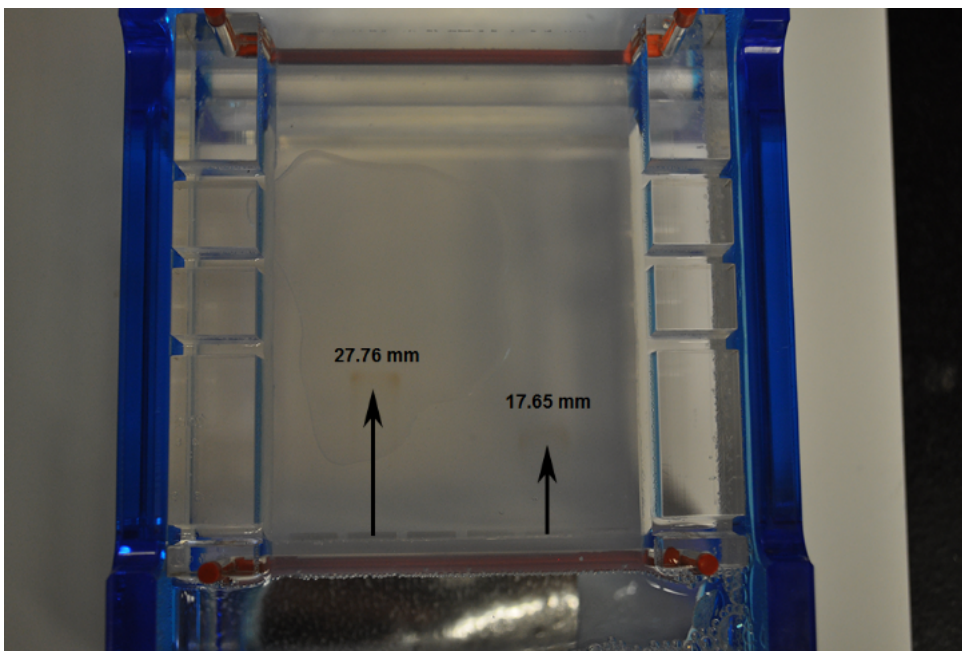

**Fig. S5.** Gel electrophoresis in 0.5% agar gel using pH 8 phosphate buffer at an applied voltage of  $80 \pm 2$  volts across a gel distance of 10 cm for 45 min.

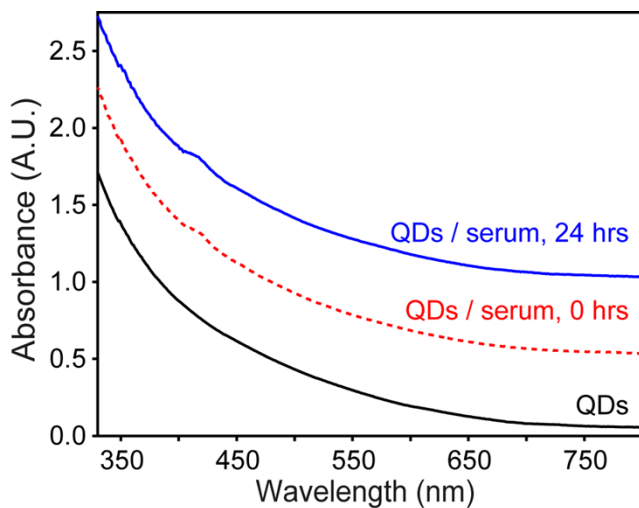

**Figure S6.** Absorption spectra of PEGylated AgInS<sub>2</sub>/ZnS QDs in deionized water (bottom, solid black), after dilution by  $\sim 75\%$  in adult bovine serum (middle, red dash), and after 24 hours incubation at 35 °C (top, blue solid). The QD spectra in serum have the serum component removed for clarity. The sample was centrifuged after 24 hours incubation which resulted in a 7% decrease in intensity in the absorption spectrum, which has been corrected for here. This demonstrates that the QDs are  $\sim 93\%$  stable under physiological conditions.

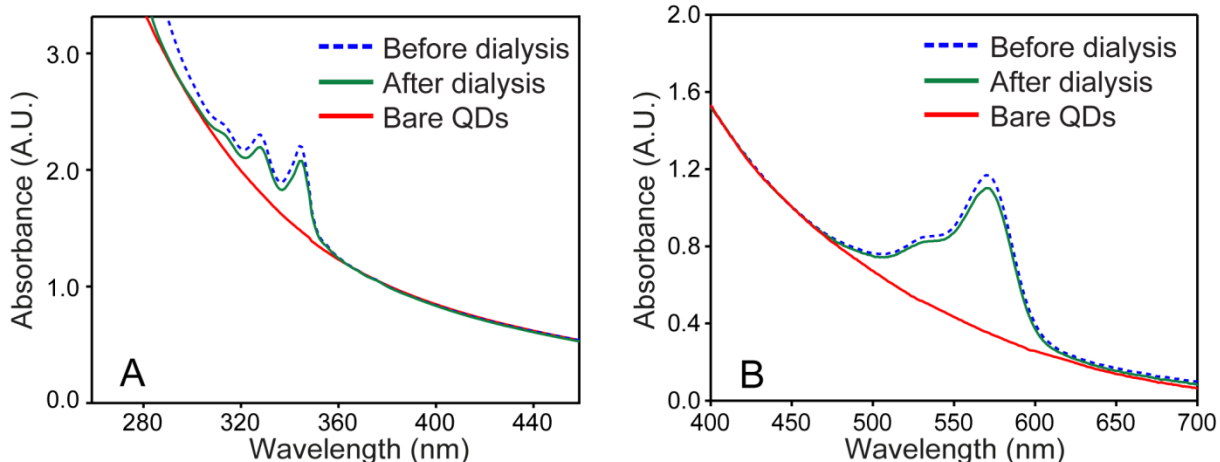

**Fig. S7.** Dye conjugation yield calculation based on absorbance spectra before and after dialysis. a) Pyrene-PEG-amine conjugated to polymer encapsulated QDs. b) Rhodamine B piperazine conjugated to silane coated QDs.

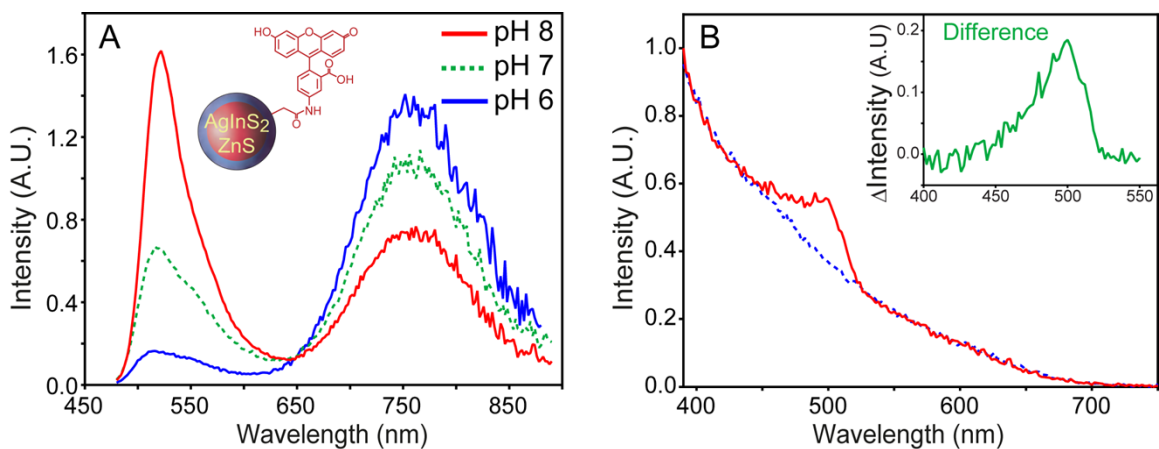

**Fig. S8.** a) Normalized emission of water-soluble AgInS<sub>2</sub>/ZnS quantum dot-fluorescein dye conjugates as a function of pH demonstrate the ability to ratiometrically report the chemical environment of the buffer solution. b) Photoluminescence excitation spectra of water-soluble AgInS<sub>2</sub>/ZnS dots and the same conjugated to fluorescein display fluorescein-like features (inset), which is indicative of energy transfer from the organic chromophore to the quantum dot.

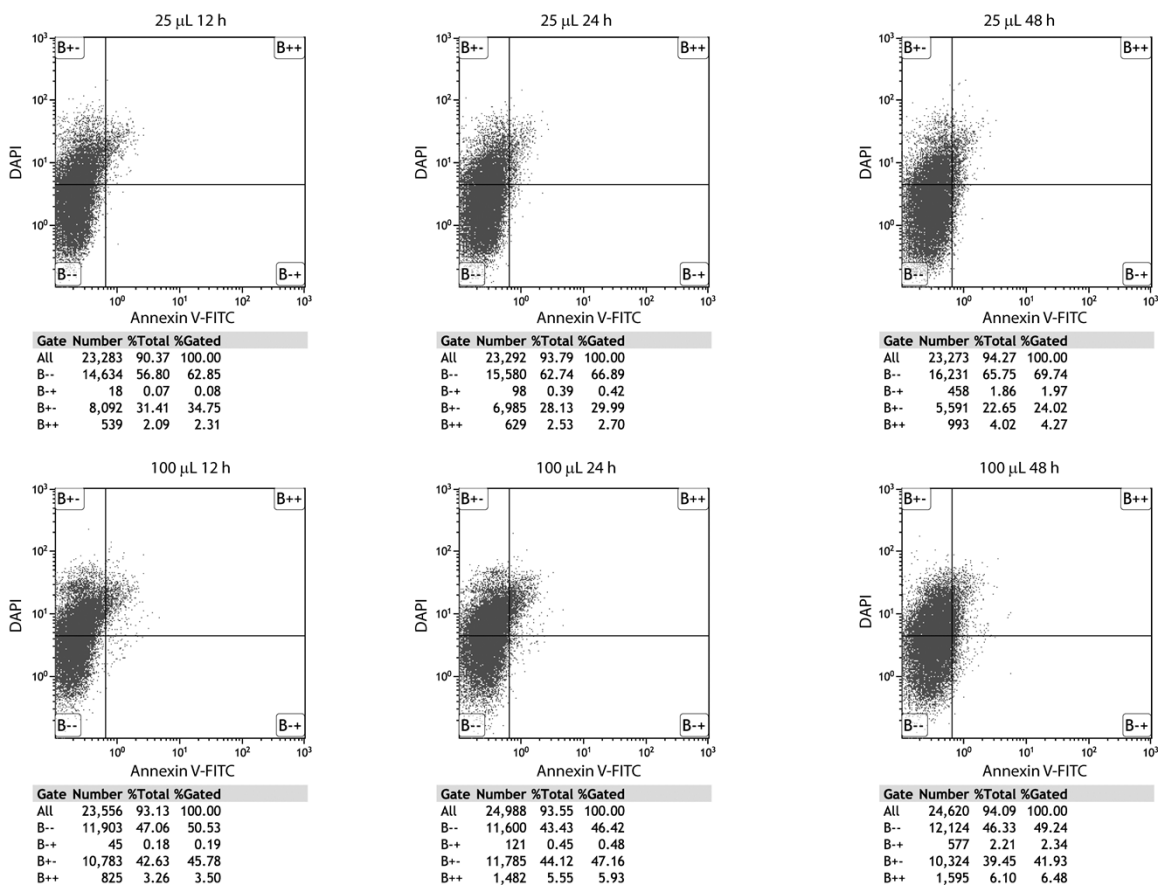

**Fig. S9.** Flow cytometry results of HeLa cells exposed to 25  $\mu$ L and 100  $\mu$ L of PEGylated AgInS<sub>2</sub>/ZnS QDs after 12, 24, and 48 hours incubation.
